# Supplementary material for: High-throughput investigation of the formation of double spinels
Source: Royal Society of Chemistry journal article supplement (doi:10.1039/d0ta09200b), 2020-01-01
Supplement: d0ta09200b1.pdf [file d0ta09200b1.pdf]

## Supplimentary Information

### High-throughput investigation of the formation of double spinels

V. Kocovski, G. Pilania, and B. P. Uberuaga

*Materials Science and Technology Division, Los Alamos National Laboratory, Los Alamos, NM 87545, USA*

Table. S1. Total energy ( $E_{\text{tot}}$ ), in eV/formula unit, of the experimentally (expr.) determined normal (left) and inverse (right) spinels, along with the energy of the compound in the other structural type.

| Composition                        | Expr. normal            |                          | Composition                        | Expr. Inverse            |                         |
|------------------------------------|-------------------------|--------------------------|------------------------------------|--------------------------|-------------------------|
|                                    | Normal $E_{\text{tot}}$ | Inverse $E_{\text{tot}}$ |                                    | Inverse $E_{\text{tot}}$ | Normal $E_{\text{tot}}$ |
| CdCr <sub>2</sub> O <sub>4</sub>   | -47.621                 | -45.616                  | Al <sub>2</sub> CdO <sub>4</sub> * | -44.367                  | -45.064                 |
| CdFe <sub>2</sub> O <sub>4</sub>   | -41.137                 | -40.763                  | Al <sub>2</sub> NiO <sub>4</sub>   | -47.119                  | -46.815                 |
| CdGa <sub>2</sub> O <sub>4</sub>   | -37.756                 | -37.230                  | Cd <sub>2</sub> GeO <sub>4</sub>   | -35.049                  | -34.737                 |
| CdIn <sub>2</sub> O <sub>4</sub>   | -35.852                 | -35.283                  | Co <sub>2</sub> CuO <sub>4</sub> * | -39.609                  | -39.806                 |
| CdMn <sub>2</sub> O <sub>4</sub>   | -45.414                 | -44.797                  | Co <sub>2</sub> FeO <sub>4</sub>   | -44.018                  | -43.680                 |
| CdRh <sub>2</sub> O <sub>4</sub>   | -40.961                 | -38.949                  | Co <sub>2</sub> MnO <sub>4</sub>   | -46.024                  | -45.590                 |
| CdV <sub>2</sub> O <sub>4</sub>    | -47.881                 | -46.934                  | Co <sub>2</sub> NiO <sub>4</sub>   | -39.444                  | -39.343                 |
| CoAl <sub>2</sub> O <sub>4</sub>   | -49.884                 | -49.557                  | Fe <sub>2</sub> CoO <sub>4</sub>   | -45.677                  | -45.626                 |
| CoCo <sub>2</sub> O <sub>4</sub>   | -42.490                 | -42.121                  | Fe <sub>2</sub> CuO <sub>4</sub>   | -42.769                  | -42.704                 |
| CoCr <sub>2</sub> O <sub>4</sub>   | -52.079                 | -50.466                  | Fe <sub>2</sub> FeO <sub>4</sub>   | -46.684                  | -46.684                 |
| CoMn <sub>2</sub> O <sub>4</sub>   | -49.665                 | -49.485                  | Fe <sub>2</sub> MgO <sub>4</sub>   | -45.402                  | -45.324                 |
| CoRh <sub>2</sub> O <sub>4</sub>   | -45.192                 | -43.796                  | Fe <sub>2</sub> NiO <sub>4</sub>   | -43.056                  | -42.309                 |
| CoV <sub>2</sub> O <sub>4</sub>    | -52.339                 | -51.646                  | Ga <sub>2</sub> CoO <sub>4</sub>   | -42.211                  | -42.137                 |
| CuAl <sub>2</sub> O <sub>4</sub>   | -46.898                 | -46.697                  | Ga <sub>2</sub> CuO <sub>4</sub>   | -39.279                  | -39.222                 |
| CuCr <sub>2</sub> O <sub>4</sub>   | -49.198                 | -47.872                  | Ga <sub>2</sub> MgO <sub>4</sub>   | -42.058                  | -41.979                 |
| CuMn <sub>2</sub> O <sub>4</sub>   | -47.207                 | -46.858                  | Ga <sub>2</sub> NiO <sub>4</sub>   | -39.659                  | -39.112                 |
| CuRh <sub>2</sub> O <sub>4</sub>   | -42.866                 | -41.499                  | Ge <sub>2</sub> FeO <sub>4</sub> * | -46.060                  | -46.227                 |
| FeAl <sub>2</sub> O <sub>4</sub>   | -50.785                 | -50.557                  | In <sub>2</sub> MgO <sub>4</sub>   | -39.621                  | -39.535                 |
| FeCr <sub>2</sub> O <sub>4</sub>   | -53.051                 | -51.684                  | Mn <sub>2</sub> FeO <sub>4</sub>   | -51.201                  | -50.986                 |
| FeV <sub>2</sub> O <sub>4</sub>    | -53.230                 | -52.799                  | Mn <sub>2</sub> NiO <sub>4</sub>   | -47.012                  | -46.400                 |
| GeCo <sub>2</sub> O <sub>4</sub> * | -43.800                 | -43.942                  | Sn <sub>2</sub> ZnO <sub>4</sub>   | -37.959                  | -37.322                 |
| GeFe <sub>2</sub> O <sub>4</sub>   | -46.227                 | -46.060                  | Zn <sub>2</sub> GeO <sub>4</sub>   | -37.336                  | -36.919                 |
| GeMg <sub>2</sub> O <sub>4</sub>   | -43.653                 | -43.560                  |                                    |                          |                         |
| GeNi <sub>2</sub> O <sub>4</sub>   | -38.774                 | -38.377                  |                                    |                          |                         |
| MgAl <sub>2</sub> O <sub>4</sub>   | -49.678                 | -49.487                  |                                    |                          |                         |
| MgCo <sub>2</sub> O <sub>4</sub>   | -42.055                 | -41.548                  |                                    |                          |                         |
| MgCr <sub>2</sub> O <sub>4</sub>   | -51.791                 | -50.315                  |                                    |                          |                         |
| MgMn <sub>2</sub> O <sub>4</sub>   | -49.544                 | -49.403                  |                                    |                          |                         |
| MgRh <sub>2</sub> O <sub>4</sub>   | -44.759                 | -43.509                  |                                    |                          |                         |
| MgTi <sub>2</sub> O <sub>4</sub>   | -56.702                 | -56.213                  |                                    |                          |                         |
| MgV <sub>2</sub> O <sub>4</sub>    | -51.986                 | -51.547                  |                                    |                          |                         |
| MnAl <sub>2</sub> O <sub>4</sub>   | -53.202                 | -52.737                  |                                    |                          |                         |
| MnCr <sub>2</sub> O <sub>4</sub>   | -55.539                 | -53.928                  |                                    |                          |                         |
| MnFe <sub>2</sub> O <sub>4</sub>   | -49.285                 | -49.048                  |                                    |                          |                         |

|                                  |         |         |
|----------------------------------|---------|---------|
| MnGa <sub>2</sub> O <sub>4</sub> | -45.685 | -45.440 |
| MnMn <sub>2</sub> O <sub>4</sub> | -53.328 | -53.327 |
| MnRh <sub>2</sub> O <sub>4</sub> | -48.697 | -47.297 |
| MnTi <sub>2</sub> O <sub>4</sub> | -60.468 | -59.937 |
| MnV <sub>2</sub> O <sub>4</sub>  | -55.804 | -55.128 |
| NiCr <sub>2</sub> O <sub>4</sub> | -48.853 | -47.903 |
| NiRh <sub>2</sub> O <sub>4</sub> | -42.010 | -41.123 |
| ZnAl <sub>2</sub> O <sub>4</sub> | -46.786 | -46.100 |
| ZnCr <sub>2</sub> O <sub>4</sub> | -48.889 | -47.023 |
| ZnFe <sub>2</sub> O <sub>4</sub> | -42.421 | -42.085 |
| ZnGa <sub>2</sub> O <sub>4</sub> | -39.092 | -38.715 |
| ZnIn <sub>2</sub> O <sub>4</sub> | -36.579 | -36.377 |
| ZnMn <sub>2</sub> O <sub>4</sub> | -46.619 | -46.097 |
| ZnRh <sub>2</sub> O <sub>4</sub> | -41.949 | -40.208 |
| ZnV <sub>2</sub> O <sub>4</sub>  | -49.093 | -48.224 |

\*Single spinel where the calculations predict a different ground state structure than experimentally reported.

Table. S2. Mixing enthalpies ( $E_{\text{mix}}$ ), in eV/formula unit, of the considered double spinels with three different types, in ascending order of the lowest  $E_{\text{mix}}$ . The single spinels that can form the double spinels, the composition of the lowest energy type and the type that they can form. In parenthesis is the cation in tetrahedral site.

| Reference single spinels         |                                  | Lowest energy            |                     |                  | $E_{\text{mix}}$ (eV/ formula unit) |         |                     |
|----------------------------------|----------------------------------|--------------------------|---------------------|------------------|-------------------------------------|---------|---------------------|
| Normal                           | Inverse                          | Composition              | Type                | $E_{\text{mix}}$ | DS-Inv <sub>1</sub>                 | DS-Norm | DS-Inv <sub>2</sub> |
| MgTi <sub>2</sub> O <sub>4</sub> | In <sub>2</sub> MgO <sub>4</sub> | (In)TiMgO <sub>4</sub>   | DS-Inv <sub>1</sub> | -2.5479          | -2.5479                             | 0.3437  | -2.0670             |
| MnTi <sub>2</sub> O <sub>4</sub> | Co <sub>2</sub> MnO <sub>4</sub> | (Mn)TiCoO <sub>4</sub>   | DS-Norm             | -1.4981          | -1.3626                             | -1.4981 | -1.3724             |
| MgTi <sub>2</sub> O <sub>4</sub> | Fe <sub>2</sub> MgO <sub>4</sub> | (Ti)FeMgO <sub>4</sub>   | DS-Inv <sub>2</sub> | -1.1102          | -1.0422                             | -0.9445 | -1.1102             |
| ZnMn <sub>2</sub> O <sub>4</sub> | Sn <sub>2</sub> ZnO <sub>4</sub> | (Zn)MnSnO <sub>4</sub>   | DS-Norm             | -0.9257          | -0.3312                             | -0.9257 | -0.9213             |
| ZnFe <sub>2</sub> O <sub>4</sub> | Sn <sub>2</sub> ZnO <sub>4</sub> | (Zn)FeSnO <sub>4</sub>   | DS-Norm             | -0.7303          | -0.0615                             | -0.7303 | -0.4832             |
| ZnIn <sub>2</sub> O <sub>4</sub> | Sn <sub>2</sub> ZnO <sub>4</sub> | (In)SnZnO <sub>4</sub>   | DS-Inv <sub>2</sub> | -0.4686          | -0.2966                             | 0.3402  | -0.4686             |
| NiRh <sub>2</sub> O <sub>4</sub> | Co <sub>2</sub> NiO <sub>4</sub> | (Co)RhNiO <sub>4</sub>   | DS-Inv <sub>1</sub> | -0.4384          | -0.4384                             | 0.0764  | 1.2278              |
| FeAl <sub>2</sub> O <sub>4</sub> | Co <sub>2</sub> FeO <sub>4</sub> | (Co)AlFeO <sub>4</sub> * | DS-Inv <sub>1</sub> | -0.3485          | -0.3485                             | -0.1827 | 0.0496              |
| FeV <sub>2</sub> O <sub>4</sub>  | Co <sub>2</sub> FeO <sub>4</sub> | (Co)VFeO <sub>4</sub> *  | DS-Inv <sub>1</sub> | -0.3452          | -0.3452                             | 0.2075  | -0.2071             |
| FeCr <sub>2</sub> O <sub>4</sub> | Co <sub>2</sub> FeO <sub>4</sub> | (Co)CrFeO <sub>4</sub> * | DS-Inv <sub>1</sub> | -0.3371          | -0.3371                             | -0.1539 | 1.2025              |
| FeV <sub>2</sub> O <sub>4</sub>  | Mn <sub>2</sub> FeO <sub>4</sub> | (Mn)VFeO <sub>4</sub>    | DS-Inv <sub>1</sub> | -0.3238          | -0.3238                             | -0.0903 | 0.3787              |
| FeCr <sub>2</sub> O <sub>4</sub> | Mn <sub>2</sub> FeO <sub>4</sub> | (Mn)CrFeO <sub>4</sub>   | DS-Inv <sub>1</sub> | -0.3186          | -0.3186                             | 0.0067  | 1.3370              |
| NiCr <sub>2</sub> O <sub>4</sub> | Ga <sub>2</sub> NiO <sub>4</sub> | (Ga)CrNiO <sub>4</sub>   | DS-Inv <sub>1</sub> | -0.2801          | -0.2801                             | 0.2507  | 1.2677              |
| FeAl <sub>2</sub> O <sub>4</sub> | Mn <sub>2</sub> FeO <sub>4</sub> | (Mn)AlFeO <sub>4</sub>   | DS-Inv <sub>1</sub> | -0.2512          | -0.2512                             | 0.0402  | 0.3002              |
| GeNi <sub>2</sub> O <sub>4</sub> | Zn <sub>2</sub> GeO <sub>4</sub> | (Zn)NiGeO <sub>4</sub>   | DS-Inv <sub>1</sub> | -0.2169          | -0.2169                             | 0.2199  | 0.6288              |
| CdRh <sub>2</sub> O <sub>4</sub> | Al <sub>2</sub> CdO <sub>4</sub> | (Cd)RhAlO <sub>4</sub>   | DS-Norm             | -0.1939          | 0.8844                              | -0.1939 | 1.4108              |
| MgV <sub>2</sub> O <sub>4</sub>  | In <sub>2</sub> MgO <sub>4</sub> | (In)VMgO <sub>4</sub>    | DS-Inv <sub>1</sub> | -0.1877          | -0.1877                             | 0.1405  | 0.3357              |
| MnV <sub>2</sub> O <sub>4</sub>  | Co <sub>2</sub> MnO <sub>4</sub> | (Mn)VCoO <sub>4</sub>    | DS-Norm             | -0.1862          | -0.1630                             | -0.1862 | 0.2190              |
| NiCr <sub>2</sub> O <sub>4</sub> | Co <sub>2</sub> NiO <sub>4</sub> | (Co)CrNiO <sub>4</sub>   | DS-Inv <sub>1</sub> | -0.1847          | -0.1847                             | 0.0592  | 0.7692              |
| NiRh <sub>2</sub> O <sub>4</sub> | Mn <sub>2</sub> NiO <sub>4</sub> | (Mn)RhNiO <sub>4</sub>   | DS-Inv <sub>1</sub> | -0.1819          | -0.1819                             | 0.1958  | 1.4819              |
| NiCr <sub>2</sub> O <sub>4</sub> | Fe <sub>2</sub> NiO <sub>4</sub> | (Fe)CrNiO <sub>4</sub>   | DS-Inv <sub>1</sub> | -0.1759          | -0.1759                             | 0.2420  | 1.1736              |
| CuRh <sub>2</sub> O <sub>4</sub> | Ga <sub>2</sub> CuO <sub>4</sub> | (Cu)RhGaO <sub>4</sub>   | DS-Norm             | -0.1653          | 0.4121                              | -0.1653 | 1.8689              |
| NiRh <sub>2</sub> O <sub>4</sub> | Ga <sub>2</sub> NiO <sub>4</sub> | (Ga)RhNiO <sub>4</sub>   | DS-Inv <sub>1</sub> | -0.1604          | -0.1604                             | 0.1752  | 1.9498              |

|                                  |                                  |                          |                     |         |         |         |        |
|----------------------------------|----------------------------------|--------------------------|---------------------|---------|---------|---------|--------|
| CuRh <sub>2</sub> O <sub>4</sub> | Fe <sub>2</sub> CuO <sub>4</sub> | (Cu)RhFeO <sub>4</sub>   | DS-Norm             | -0.1524 | 0.4419  | -0.1524 | 1.6854 |
| MnRh <sub>2</sub> O <sub>4</sub> | Co <sub>2</sub> MnO <sub>4</sub> | (Co)RhMnO <sub>4</sub>   | DS-Inv <sub>1</sub> | -0.1471 | -0.1471 | 0.0550  | 1.5548 |
| GeMg <sub>2</sub> O <sub>4</sub> | Zn <sub>2</sub> GeO <sub>4</sub> | (Zn)MgGeO <sub>4</sub>   | DS-Inv <sub>1</sub> | -0.1384 | -0.1384 | 0.1742  | 0.2133 |
| CoRh <sub>2</sub> O <sub>4</sub> | Fe <sub>2</sub> CoO <sub>4</sub> | (Co)RhFeO <sub>4</sub>   | DS-Norm             | -0.1340 | 0.2240  | -0.1340 | 1.9256 |
| GeCo <sub>2</sub> O <sub>4</sub> | Zn <sub>2</sub> GeO <sub>4</sub> | (Zn)CoGeO <sub>4</sub>   | DS-Inv <sub>1</sub> | -0.1274 | -0.1274 | 0.2810  | 0.1505 |
| MgRh <sub>2</sub> O <sub>4</sub> | Ga <sub>2</sub> MgO <sub>4</sub> | (Ga)RhMgO <sub>4</sub>   | DS-Inv <sub>1</sub> | -0.1220 | -0.1220 | -0.1077 | 2.0432 |
| NiRh <sub>2</sub> O <sub>4</sub> | Fe <sub>2</sub> NiO <sub>4</sub> | (Fe)RhNiO <sub>4</sub>   | DS-Inv <sub>1</sub> | -0.1199 | -0.1199 | 0.1495  | 1.7222 |
| CoRh <sub>2</sub> O <sub>4</sub> | Ga <sub>2</sub> CoO <sub>4</sub> | (Co)RhGaO <sub>4</sub>   | DS-Norm             | -0.1160 | 0.2056  | -0.1160 | 2.0488 |
| MgV <sub>2</sub> O <sub>4</sub>  | Ga <sub>2</sub> MgO <sub>4</sub> | (Ga)VMgO <sub>4</sub>    | DS-Inv <sub>1</sub> | -0.1003 | -0.1003 | 0.0935  | 0.5836 |
| MnAl <sub>2</sub> O <sub>4</sub> | Co <sub>2</sub> MnO <sub>4</sub> | (Co)AlMnO <sub>4</sub>   | DS-Inv <sub>1</sub> | -0.0969 | -0.0969 | 0.0888  | 0.2869 |
| CuMn <sub>2</sub> O <sub>4</sub> | Co <sub>2</sub> CuO <sub>4</sub> | (Cu)MnCoO <sub>4</sub>   | DS-Norm             | -0.0904 | 0.2101  | -0.0904 | 0.3753 |
| MgAl <sub>2</sub> O <sub>4</sub> | Ga <sub>2</sub> MgO <sub>4</sub> | (Ga)AlMgO <sub>4</sub>   | DS-Inv <sub>1</sub> | -0.0861 | -0.0861 | 0.0685  | 0.3148 |
| CuAl <sub>2</sub> O <sub>4</sub> | Ga <sub>2</sub> CuO <sub>4</sub> | (Ga)AlCuO <sub>4</sub>   | DS-Inv <sub>1</sub> | -0.0846 | -0.0846 | 0.0631  | 0.3330 |
| CuRh <sub>2</sub> O <sub>4</sub> | Co <sub>2</sub> CuO <sub>4</sub> | (Cu)RhCoO <sub>4</sub>   | DS-Norm             | -0.0843 | 0.0267  | -0.0843 | 1.4552 |
| MgRh <sub>2</sub> O <sub>4</sub> | Fe <sub>2</sub> MgO <sub>4</sub> | (Mg)RhFeO <sub>4</sub>   | DS-Norm             | -0.0784 | -0.0063 | -0.0784 | 1.9579 |
| NiCr <sub>2</sub> O <sub>4</sub> | Al <sub>2</sub> NiO <sub>4</sub> | (Al)CrNiO <sub>4</sub>   | DS-Inv <sub>1</sub> | -0.0739 | -0.0739 | 0.1201  | 1.1487 |
| CdCr <sub>2</sub> O <sub>4</sub> | Al <sub>2</sub> CdO <sub>4</sub> | (Cd)CrAlO <sub>4</sub>   | DS-Norm             | -0.0674 | 0.7269  | -0.0674 | 1.8579 |
| MgRh <sub>2</sub> O <sub>4</sub> | In <sub>2</sub> MgO <sub>4</sub> | (In)RhMgO <sub>4</sub>   | DS-Inv <sub>1</sub> | -0.0660 | -0.0660 | 1.4595  | 0.0197 |
| MgMn <sub>2</sub> O <sub>4</sub> | In <sub>2</sub> MgO <sub>4</sub> | (In)MnMgO <sub>4</sub>   | DS-Inv <sub>1</sub> | -0.0627 | -0.0627 | 0.2694  | 0.9532 |
| MnCr <sub>2</sub> O <sub>4</sub> | Co <sub>2</sub> MnO <sub>4</sub> | (Co)CrMnO <sub>4</sub>   | DS-Inv <sub>1</sub> | -0.0619 | -0.0619 | 0.1791  | 1.2718 |
| CuMn <sub>2</sub> O <sub>4</sub> | Fe <sub>2</sub> CuO <sub>4</sub> | (Cu)MnFeO <sub>4</sub>   | DS-Norm             | -0.0579 | 0.0841  | -0.0579 | 0.1874 |
| GeFe <sub>2</sub> O <sub>4</sub> | Cd <sub>2</sub> GeO <sub>4</sub> | (Cd)FeGeO <sub>4</sub>   | DS-Inv <sub>1</sub> | -0.0544 | -0.0544 | 0.2014  | 0.4079 |
| GeCo <sub>2</sub> O <sub>4</sub> | Cd <sub>2</sub> GeO <sub>4</sub> | (Cd)CoGeO <sub>4</sub>   | DS-Inv <sub>1</sub> | -0.0512 | -0.0512 | 0.3805  | 0.4768 |
| GeNi <sub>2</sub> O <sub>4</sub> | Cd <sub>2</sub> GeO <sub>4</sub> | (Cd)NiGeO <sub>4</sub>   | DS-Inv <sub>1</sub> | -0.0511 | -0.0511 | 0.4049  | 0.9373 |
| CdFe <sub>2</sub> O <sub>4</sub> | Al <sub>2</sub> CdO <sub>4</sub> | (Cd)FeAlO <sub>4</sub>   | DS-Norm             | -0.0475 | 0.6485  | -0.0475 | 0.5725 |
| MgCr <sub>2</sub> O <sub>4</sub> | Ga <sub>2</sub> MgO <sub>4</sub> | (Ga)CrMgO <sub>4</sub>   | DS-Inv <sub>1</sub> | -0.0407 | -0.0407 | 0.0502  | 0.8797 |
| CuMn <sub>2</sub> O <sub>4</sub> | Ga <sub>2</sub> CuO <sub>4</sub> | (Cu)MnGaO <sub>4</sub>   | DS-Norm             | -0.0343 | 0.0746  | -0.0343 | 0.2159 |
| GeMg <sub>2</sub> O <sub>4</sub> | Cd <sub>2</sub> GeO <sub>4</sub> | (Cd)MgGeO <sub>4</sub>   | DS-Inv <sub>1</sub> | -0.0177 | -0.0177 | 0.3267  | 0.4832 |
| MnGa <sub>2</sub> O <sub>4</sub> | Co <sub>2</sub> MnO <sub>4</sub> | (Co)GaMnO <sub>4</sub> * | DS-Inv <sub>1</sub> | -0.0145 | -0.0145 | 0.1404  | 0.0252 |
| CuAl <sub>2</sub> O <sub>4</sub> | Co <sub>2</sub> CuO <sub>4</sub> | (Cu)AlCoO <sub>4</sub>   | DS-Norm             | -0.0140 | 0.0515  | -0.0140 | 0.7146 |
| MnFe <sub>2</sub> O <sub>4</sub> | Co <sub>2</sub> MnO <sub>4</sub> | (Co)MnFeO <sub>4</sub> * | DS-Inv <sub>1</sub> | -0.0065 | -0.0065 | 0.1932  | 0.1751 |
| CdGa <sub>2</sub> O <sub>4</sub> | Al <sub>2</sub> CdO <sub>4</sub> | (Cd)GaAlO <sub>4</sub>   | DS-Norm             | 0.0042  | 0.7665  | 0.0042  | 0.4745 |
| CoAl <sub>2</sub> O <sub>4</sub> | Ga <sub>2</sub> CoO <sub>4</sub> | (Ga)AlCoO <sub>4</sub>   | DS-Inv <sub>1</sub> | 0.0045  | 0.0045  | 0.0301  | 0.4419 |
| GeFe <sub>2</sub> O <sub>4</sub> | Zn <sub>2</sub> GeO <sub>4</sub> | (Zn)FeGeO <sub>4</sub>   | DS-Inv <sub>1</sub> | 0.0057  | 0.0057  | 0.2080  | 0.2218 |
| CoCr <sub>2</sub> O <sub>4</sub> | Fe <sub>2</sub> CoO <sub>4</sub> | (Co)CrFeO <sub>4</sub> * | DS-Norm             | 0.0064  | 0.1896  | 0.0064  | 1.5106 |
| CoMn <sub>2</sub> O <sub>4</sub> | Fe <sub>2</sub> CoO <sub>4</sub> | (Co)MnFeO <sub>4</sub> * | DS-Norm             | 0.0100  | 0.1359  | 0.0100  | 0.2097 |
| CoCr <sub>2</sub> O <sub>4</sub> | Ga <sub>2</sub> CoO <sub>4</sub> | (Co)CrGaO <sub>4</sub>   | DS-Norm             | 0.0138  | 0.1055  | 0.0138  | 1.6235 |
| MgV <sub>2</sub> O <sub>4</sub>  | Fe <sub>2</sub> MgO <sub>4</sub> | (Mg)VFeO <sub>4</sub>    | DS-Norm             | 0.0146  | 0.0573  | 0.0146  | 0.4309 |
| NiRh <sub>2</sub> O <sub>4</sub> | Al <sub>2</sub> NiO <sub>4</sub> | (Ni)RhAlO <sub>4</sub>   | DS-Norm             | 0.0162  | 0.1416  | 0.0162  | 1.8848 |
| MgCr <sub>2</sub> O <sub>4</sub> | Fe <sub>2</sub> MgO <sub>4</sub> | (Mg)CrFeO <sub>4</sub>   | DS-Norm             | 0.0194  | 0.1136  | 0.0194  | 1.4385 |
| CdMn <sub>2</sub> O <sub>4</sub> | Al <sub>2</sub> CdO <sub>4</sub> | (Cd)MnAlO <sub>4</sub>   | DS-Norm             | 0.0286  | 0.7582  | 0.0286  | 1.1452 |
| CoAl <sub>2</sub> O <sub>4</sub> | Fe <sub>2</sub> CoO <sub>4</sub> | (Co)AlFeO <sub>4</sub> * | DS-Norm             | 0.0305  | 0.1963  | 0.0305  | 0.4492 |
| CuCr <sub>2</sub> O <sub>4</sub> | Fe <sub>2</sub> CuO <sub>4</sub> | (Cu)CrFeO <sub>4</sub>   | DS-Norm             | 0.0316  | 0.2038  | 0.0316  | 1.2665 |
| CoMn <sub>2</sub> O <sub>4</sub> | Ga <sub>2</sub> CoO <sub>4</sub> | (Co)GaMnO <sub>4</sub> * | DS-Norm             | 0.0329  | 0.1089  | 0.0329  | 0.2242 |
| MgCo <sub>2</sub> O <sub>4</sub> | Ga <sub>2</sub> MgO <sub>4</sub> | (Ga)CoMgO <sub>4</sub>   | DS-Inv <sub>1</sub> | 0.0356  | 0.0356  | 0.2475  | 0.5215 |
| CoV <sub>2</sub> O <sub>4</sub>  | Ga <sub>2</sub> CoO <sub>4</sub> | (Ga)VCoO <sub>4</sub>    | DS-Inv <sub>1</sub> | 0.0389  | 0.0389  | 0.0793  | 0.6971 |
| CoV <sub>2</sub> O <sub>4</sub>  | Fe <sub>2</sub> CoO <sub>4</sub> | (Co)VFeO <sub>4</sub> *  | DS-Norm             | 0.0397  | 0.1518  | 0.0397  | 0.5915 |
| CuAl <sub>2</sub> O <sub>4</sub> | Fe <sub>2</sub> CuO <sub>4</sub> | (Cu)AlFeO <sub>4</sub>   | DS-Norm             | 0.0417  | 0.0988  | 0.0417  | 0.3793 |

|                                  |                                  |                        |                     |        |        |        |        |
|----------------------------------|----------------------------------|------------------------|---------------------|--------|--------|--------|--------|
| CuCr <sub>2</sub> O <sub>4</sub> | Ga <sub>2</sub> CuO <sub>4</sub> | (Cu)CrGaO <sub>4</sub> | DS-Norm             | 0.0439 | 0.1029 | 0.0439 | 1.3750 |
| MgCr <sub>2</sub> O <sub>4</sub> | In <sub>2</sub> MgO <sub>4</sub> | (In)CrMgO <sub>4</sub> | DS-Inv <sub>1</sub> | 0.0506 | 0.0506 | 0.1606 | 1.6992 |
| CdIn <sub>2</sub> O <sub>4</sub> | Al <sub>2</sub> CdO <sub>4</sub> | (Cd)InAlO <sub>4</sub> | DS-Norm             | 0.0559 | 0.7791 | 0.0559 | 0.5007 |
| CuCr <sub>2</sub> O <sub>4</sub> | Co <sub>2</sub> CuO <sub>4</sub> | (Cu)CrCoO <sub>4</sub> | DS-Norm             | 0.0564 | 0.1173 | 0.0564 | 1.1591 |
| MgMn <sub>2</sub> O <sub>4</sub> | Ga <sub>2</sub> MgO <sub>4</sub> | (Ga)MnMgO <sub>4</sub> | DS-Inv <sub>1</sub> | 0.0641 | 0.0641 | 0.1795 | 0.8513 |
| MgAl <sub>2</sub> O <sub>4</sub> | Fe <sub>2</sub> MgO <sub>4</sub> | (Mg)AlFeO <sub>4</sub> | DS-Norm             | 0.0735 | 0.1791 | 0.0735 | 0.2850 |
| MgAl <sub>2</sub> O <sub>4</sub> | In <sub>2</sub> MgO <sub>4</sub> | (In)AlMgO <sub>4</sub> | DS-Inv <sub>1</sub> | 0.0869 | 0.0869 | 0.2521 | 0.5007 |
| MgTi <sub>2</sub> O <sub>4</sub> | Ga <sub>2</sub> MgO <sub>4</sub> | (Ga)TiMgO <sub>4</sub> | DS-Inv <sub>1</sub> | 0.0989 | 0.0989 | 0.2926 | 0.8843 |
| MgMn <sub>2</sub> O <sub>4</sub> | Fe <sub>2</sub> MgO <sub>4</sub> | (Mg)MnFeO <sub>4</sub> | DS-Norm             | 0.1281 | 0.1335 | 0.1281 | 0.7210 |
| ZnV <sub>2</sub> O <sub>4</sub>  | Sn <sub>2</sub> ZnO <sub>4</sub> | (Zn)VSnO <sub>4</sub>  | DS-Norm             | 0.1285 | 0.6630 | 0.1285 | 1.1823 |
| MgCo <sub>2</sub> O <sub>4</sub> | Fe <sub>2</sub> MgO <sub>4</sub> | (Mg)CoFeO <sub>4</sub> | DS-Norm             | 0.1392 | 0.2615 | 0.1392 | 0.2850 |
| ZnRh <sub>2</sub> O <sub>4</sub> | Sn <sub>2</sub> ZnO <sub>4</sub> | (Zn)RhSnO <sub>4</sub> | DS-Norm             | 0.2668 | 0.3802 | 0.2668 | 1.2355 |
| MgCo <sub>2</sub> O <sub>4</sub> | In <sub>2</sub> MgO <sub>4</sub> | (In)CoMgO <sub>4</sub> | DS-Inv <sub>1</sub> | 0.2693 | 0.2693 | 0.3013 | 0.8027 |
| NiCr <sub>2</sub> O <sub>4</sub> | Mn <sub>2</sub> NiO <sub>4</sub> | (Ni)CrMnO <sub>4</sub> | DS-Norm             | 0.2766 | 0.3623 | 0.2766 | 1.0442 |
| ZnCr <sub>2</sub> O <sub>4</sub> | Sn <sub>2</sub> ZnO <sub>4</sub> | (Zn)CrSnO <sub>4</sub> | DS-Norm             | 0.4610 | 0.6684 | 0.4610 | 0.9382 |
| ZnGa <sub>2</sub> O <sub>4</sub> | Sn <sub>2</sub> ZnO <sub>4</sub> | (Sn)GaZnO <sub>4</sub> | DS-Inv <sub>1</sub> | 0.6737 | 0.6737 | 0.6985 | 0.9087 |
| ZnAl <sub>2</sub> O <sub>4</sub> | Sn <sub>2</sub> ZnO <sub>4</sub> | (Sn)AlZnO <sub>4</sub> | DS-Inv <sub>1</sub> | 0.8791 | 0.8791 | 0.9545 | 1.5088 |
| CdV <sub>2</sub> O <sub>4</sub>  | Al <sub>2</sub> CdO <sub>4</sub> | (Cd)VAlO <sub>4</sub>  | DS-Norm             | 0.9003 | 1.5339 | 0.9003 | 1.9242 |
| FeV <sub>2</sub> O <sub>4</sub>  | Ge <sub>2</sub> FeO <sub>4</sub> | (Ge)VFeO <sub>4</sub>  | DS-Inv <sub>1</sub> | 0.9904 | 0.9904 | 1.1672 | 2.4722 |
| FeCr <sub>2</sub> O <sub>4</sub> | Ge <sub>2</sub> FeO <sub>4</sub> | (Ge)CrFeO <sub>4</sub> | DS-Inv <sub>1</sub> | 1.3604 | 1.3604 | 1.5721 | 1.7258 |
| FeAl <sub>2</sub> O <sub>4</sub> | Ge <sub>2</sub> FeO <sub>4</sub> | (Fe)AlGeO <sub>4</sub> | DS-Norm             | 1.7070 | 2.0412 | 1.7070 | 2.1582 |

\*Double spinels with same composition, but can be made from different single spinels

Table. S3. List of single spinels for which other structure type (other phase) is reported to be more stable, with their space group, and total energy of the other phase and the spinel. The three last columns on the right show the reevaluated  $E_{\text{mix}}$  using the energy of the more stable other phase.

| Composition                      | Space group | $E_{\text{tot}}$ (eV/formula unit) |                | Reevaluated $E_{\text{mix}}$ (eV/formula unit) |         |                     |
|----------------------------------|-------------|------------------------------------|----------------|------------------------------------------------|---------|---------------------|
|                                  |             | Other phase                        | Spinel         | DS-Inv <sub>1</sub>                            | DS-Norm | DS-Inv <sub>2</sub> |
| Zn <sub>2</sub> GeO <sub>4</sub> | R-3         | <b>-37.493</b>                     | -37.336        | <b>-0.0487</b>                                 | 0.3597  | 0.2292              |
|                                  |             |                                    |                | 0.0844                                         | 0.2867  | 0.3005              |
|                                  |             |                                    |                | <b>-0.0597</b>                                 | 0.2529  | 0.2920              |
|                                  |             |                                    |                | <b>-0.1382</b>                                 | 0.2986  | 0.7075              |
| Cd <sub>2</sub> GeO <sub>4</sub> | Pnma        | <b>-35.417</b>                     | -35.049        | 0.1329                                         | 0.5646  | 0.6609              |
|                                  |             |                                    |                | 0.1297                                         | 0.3854  | 0.5920              |
|                                  |             |                                    |                | 0.1664                                         | 0.5108  | 0.6673              |
|                                  |             |                                    |                | 0.1330                                         | 0.5890  | 1.1213              |
| ZnIn <sub>2</sub> O <sub>4</sub> | Pnma        | -36.334                            | <b>-36.579</b> |                                                |         |                     |
| ZnIn <sub>2</sub> O <sub>4</sub> | P21/c       | -36.574                            | <b>-36.579</b> |                                                |         |                     |
| GeMg <sub>2</sub> O <sub>4</sub> | Pnma        | -43.649                            | <b>-43.653</b> |                                                |         |                     |
| Cr <sub>2</sub> FeO <sub>4</sub> | Pnma        | -52.510                            | <b>-53.051</b> |                                                |         |                     |
| Fe <sub>2</sub> MgO <sub>4</sub> | Imma        | -44.645                            | <b>-45.402</b> |                                                |         |                     |

Table. S4. Relative stability, i.e., distance from convex hull ( $E$  in eV) for the single spinels that form the same double spinel structure with different type, taken from Materials Project [1].

| DS-Inv <sub>1</sub>              |          |                                  |          | DS-Inv <sub>2</sub>              |          |                                  |          |
|----------------------------------|----------|----------------------------------|----------|----------------------------------|----------|----------------------------------|----------|
| Normal                           | $E$ (eV) | Inverse                          | $E$ (eV) | Normal                           | $E$ (eV) | Inverse                          | $E$ (eV) |
| Al <sub>2</sub> FeO <sub>4</sub> | 0.137    | Co <sub>2</sub> FeO              | 0.037    | Al <sub>2</sub> CoO <sub>4</sub> | 0        | Fe <sub>2</sub> CoO <sub>4</sub> | 0        |
| V <sub>2</sub> FeO <sub>4</sub>  | 0.099    | Co <sub>2</sub> FeO <sub>4</sub> | 0.037    | V <sub>2</sub> CoO <sub>4</sub>  | 0        | Fe <sub>2</sub> CoO <sub>4</sub> | 0        |
| Cr <sub>2</sub> FeO <sub>4</sub> | 0.139    | Co <sub>2</sub> FeO <sub>4</sub> | 0.037    | Cr <sub>2</sub> CoO <sub>4</sub> | 0        | Fe <sub>2</sub> CoO <sub>4</sub> | 0        |
| Ga <sub>2</sub> MnO <sub>4</sub> | no data  | Co <sub>2</sub> MnO <sub>4</sub> | 0.202    | Mn <sub>2</sub> CoO <sub>4</sub> | 0.006    | Ga <sub>2</sub> CoO <sub>4</sub> | 0        |
| Fe <sub>2</sub> MnO <sub>4</sub> | 0        | Co <sub>2</sub> MnO <sub>4</sub> | 0.202    | Mn <sub>2</sub> CoO <sub>4</sub> | 0.006    | Fe <sub>2</sub> CoO <sub>4</sub> | 0        |

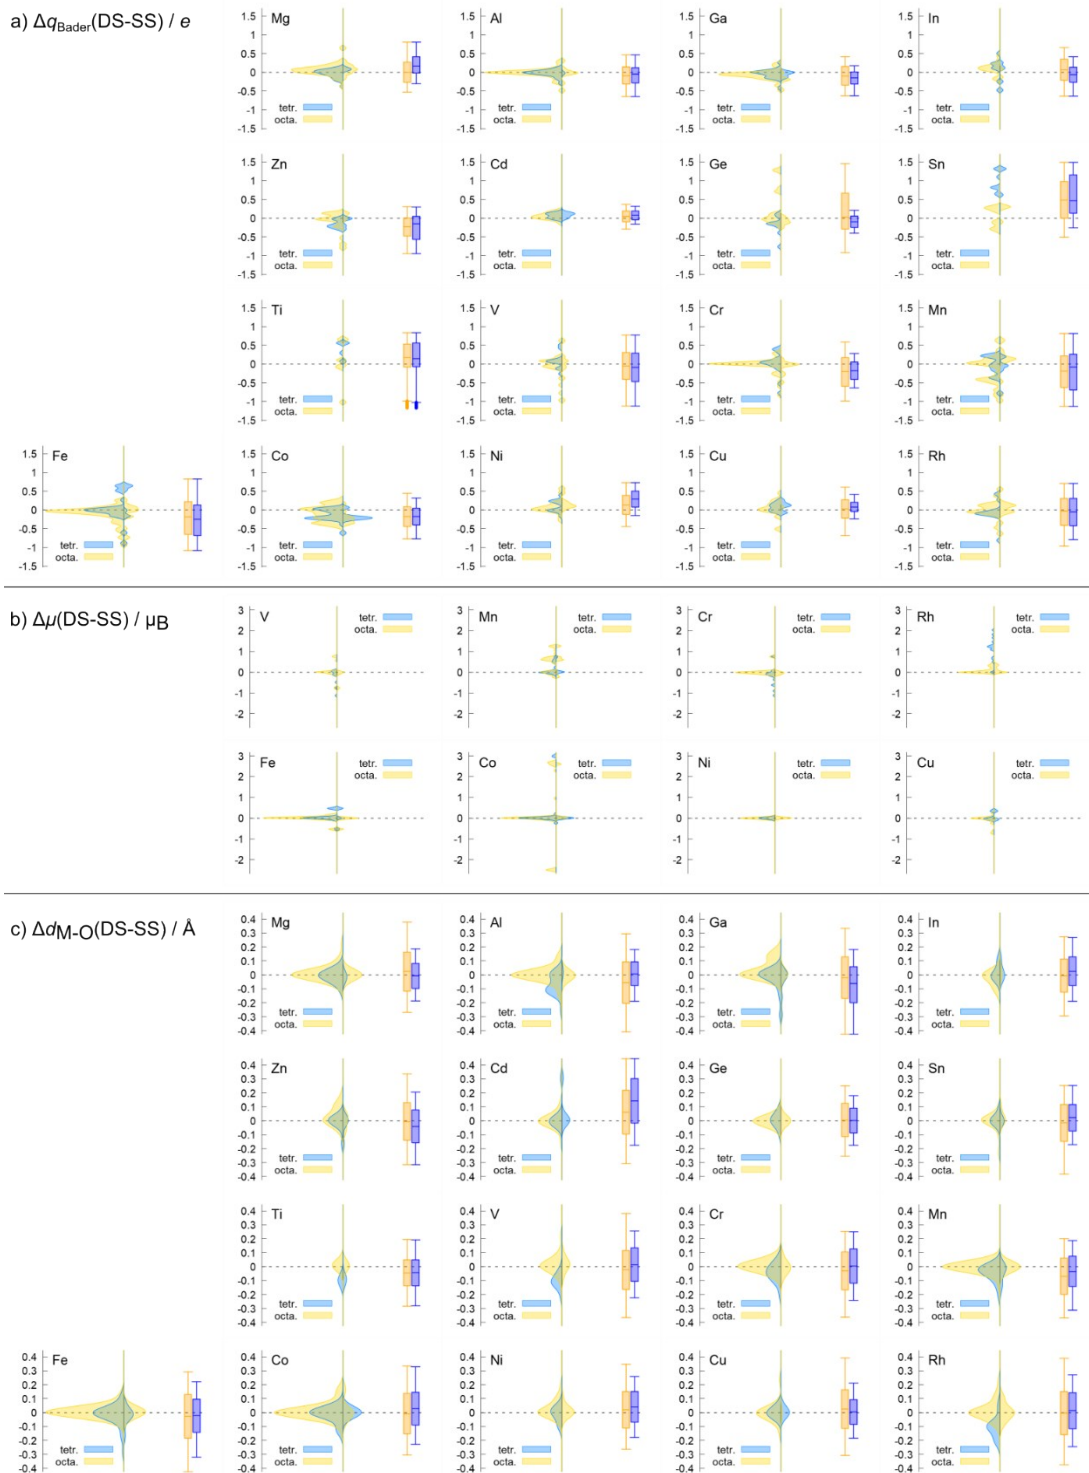

Fig. S1. Violin plots showing the distribution of the: a) Bader charge ( $\Delta q_{\text{bader}}$ ), b) magnetic moment ( $\Delta \mu$ ), and c) cation–oxygen distance ( $\Delta d_{\text{M-O}}$ ) difference in the double spinel (DS) and the reference single spinels (SS) for all cations. The cation site, tetrahedral and octahedral is shown in blue and yellow, respectively. The distribution in all spinels and only in the stable spinels is shown in the left and right part of the violin plot, respectively. The box-plots for the total number and stable double spinels are shown in orange and purple, respectively.

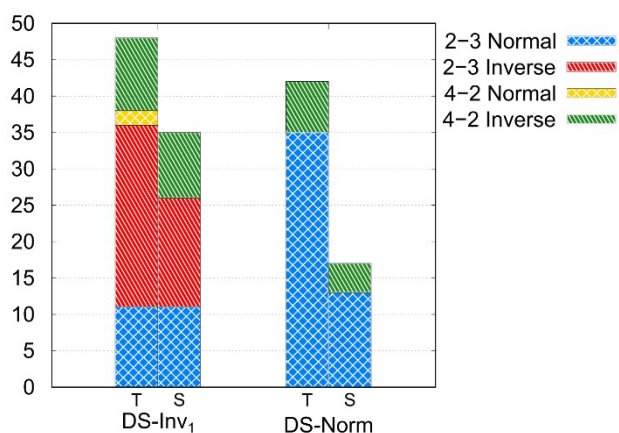

Fig. S2. Histogram showing the total number (T) and number of stable spinels (S) of different spinel type for DS-InV<sub>1</sub> and DS-Norm double spinels. Spinel DS-Norm-3 Normal, 2-3 Inverse, 4-2 Normal and 4-2 Inverse are shown in blue, red, yellow and green, respectively. Normal and inverse type are shown in lattice and striped pattern, respectively.

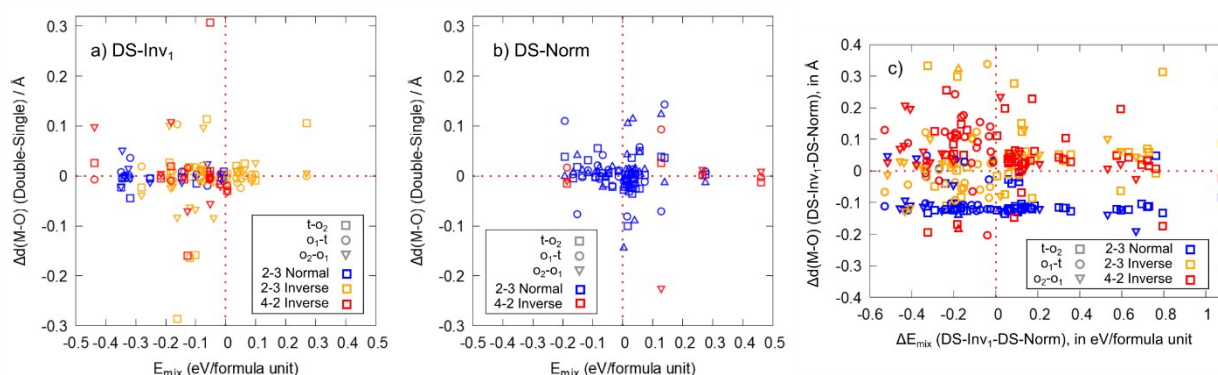

Fig. S3. Cation–oxygen distance difference ( $\Delta d(M-O)$ ) between the double spinel and reference single spinels in: a) DS-InV<sub>1</sub>, and b) DS-Norm double spinel as a function of the  $E_{\text{mix}}$ . c)  $\Delta d(M-O)$  between DS-InV<sub>1</sub> and DS-Norm double spinel as a function of the difference in  $E_{\text{mix}}$  ( $\Delta E_{\text{mix}}$ ) between the two types. The  $\Delta d(M-O)$  is calculated between the same cations in the three sites: tetrahedral (t), octahedral 1 ( $o_1$ ) and 2 ( $o_2$ ). The data from the 2-3 normal, 2-3 inverse and 4-2 inverse spinel is shown in blue, orange and red, respectively.

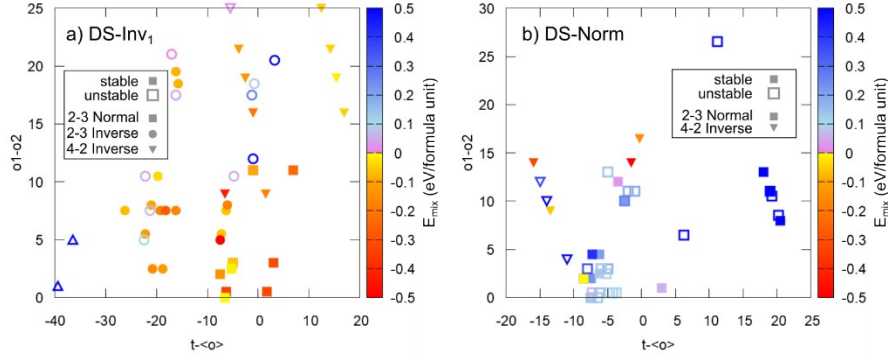

Fig. S4. Relation between tetrahedral–average octahedral site ionic radii and octahedral–octahedral ionic radii in: a) DS-Inv<sub>1</sub>, and b) DS-Norm double spinels. Filled and open points show stable and unstable double spinels, respectively, respectively. The data from the 2-3 normal, 2-3 inverse and 4-2 inverse spinel is shown with square, circle and triangle points, respectively.

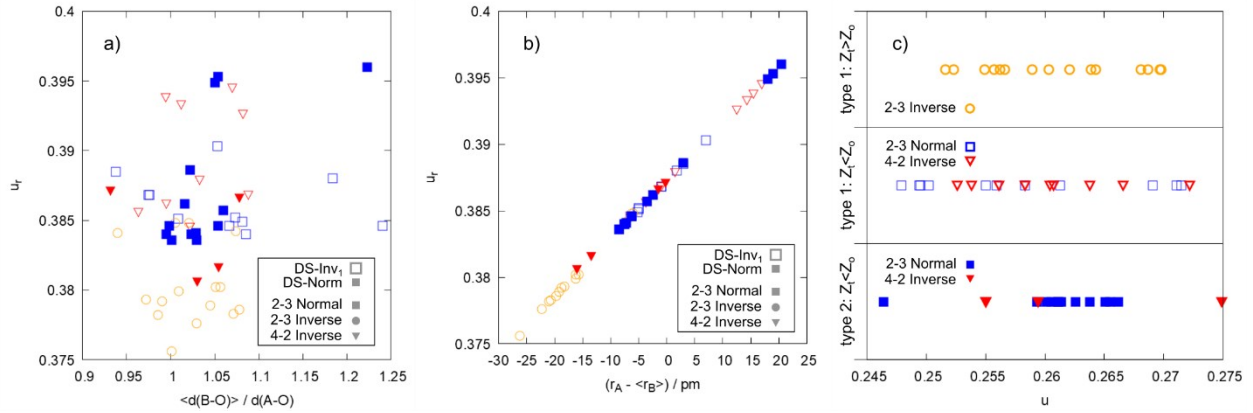

Fig. S5 Separating the double spinels based on: a) Sickafus et. al. [2], b) Yokoyama et. al. [3] and c) Stevanović et. al. [4] methods. A and B refers to the cations in a tetrahedral and octahedral site, respectively. Open and filled points show DS-Inv<sub>1</sub> and DS-Norm double spinel data, respectively. The data from the 2-3 normal, 2-3 inverse and 4-2 inverse spinel is shown with square, circle and triangle points, respectively.  $u_r$  and  $u$  are the anionic parameters, calculated using the equations:

$$u_r = \frac{r_A - \langle r_B \rangle}{(1 + \sqrt{3})a} + \frac{1.058}{1 + \sqrt{3}} \langle r_B \rangle$$

$\langle r_B \rangle$  is the average ionic radius on octahedral site; and

$$u = \frac{d(M_t - O)}{a\sqrt{3}} + \frac{1}{8}, d(M_t - O)$$

is the average distance between oxygen and the cation in tetrahedral site.

## References:

- [1] Commentary: The Materials Project: A materials genome approach to accelerating materials innovation. Jain, Anubhav, et al. s.l. : AIP Publishing, 7 2013, APL Materials, Vol. 1, p. 011002.
- [2] Structure of Spinel. Sickafus, Kurt E., Wills, John M. and Grimes, Norman W. s.l. : Wiley, 12 2004, Journal of the American Ceramic Society, Vol. 82, pp. 3279–3292.
- [3] Relationship between Average Cation Radii and Oxygen Parameter for Various Oxides with Spinel-Type Structure. Yokoyama, Takashi and Meguro, Takeshi. s.l. : IOP Publishing, 8 2005, Japanese Journal of Applied Physics, Vol. 44, pp. 6201–6203.
- [4] Simple Point-Ion Electrostatic Model Explains the Cation Distribution in Spinel Oxides. Stevanović, Vlado, d'Avezac, Mayeul and Zunger, Alex. s.l. : American Physical Society (APS), 8 2010, Physical Review Letters, Vol. 105.
